# Supplementary material for: Core-Sheath Pt-CeO2/Mesoporous SiO2 Electrospun Nanofibers as Catalysts for the Reverse Water Gas Shift Reaction
Source: MDPI journal article supplement (doi:10.3390/nano13030485), 2023-01-25
Supplement: s1 [file s1]

Supplementary Materials

## Core-Sheath Pt-CeO<sub>2</sub>/Mesoporous SiO<sub>2</sub> Electrospun Nanofibers as Catalysts for the Reverse Water Gas Shift Reaction

Aidin Nejadsalim <sup>1,†</sup>, Najmeh Bashiri <sup>2,3,†</sup>, Hamid Reza Godini <sup>4</sup>, Rafael L. Oliveira <sup>5</sup>, Asma Tufail Shah <sup>1,6</sup>, Maged F. Bekheet <sup>1</sup>, Arne Thomas <sup>2</sup>, Reinhard Schomaecker <sup>3</sup>, Aleksander Gurlo <sup>1</sup> and Oliver Görke <sup>1,\*</sup>

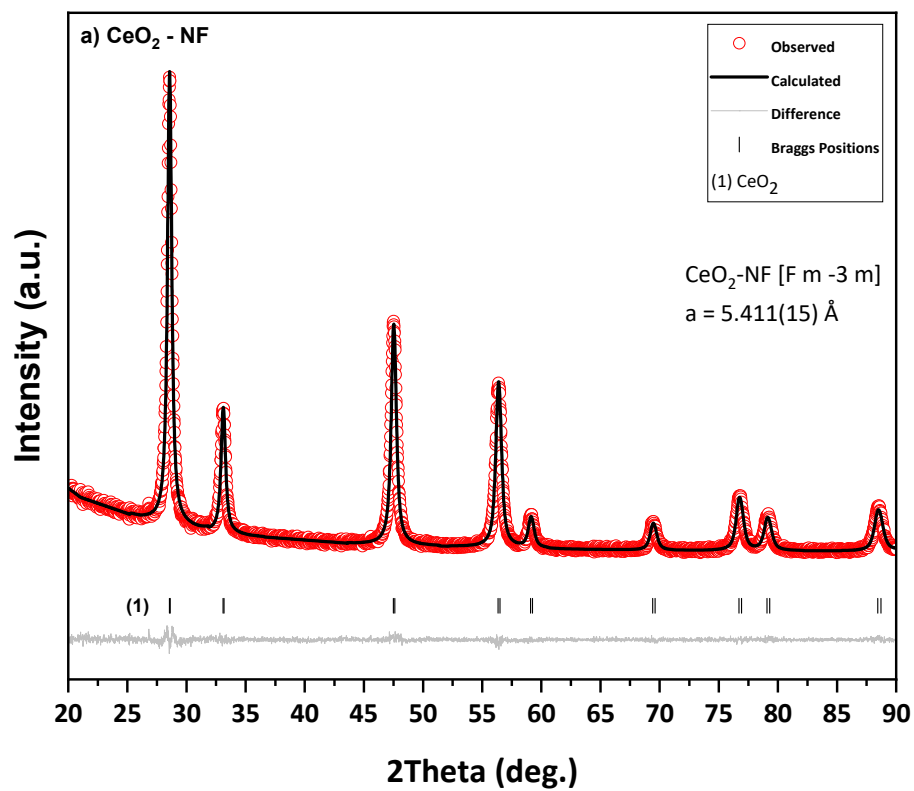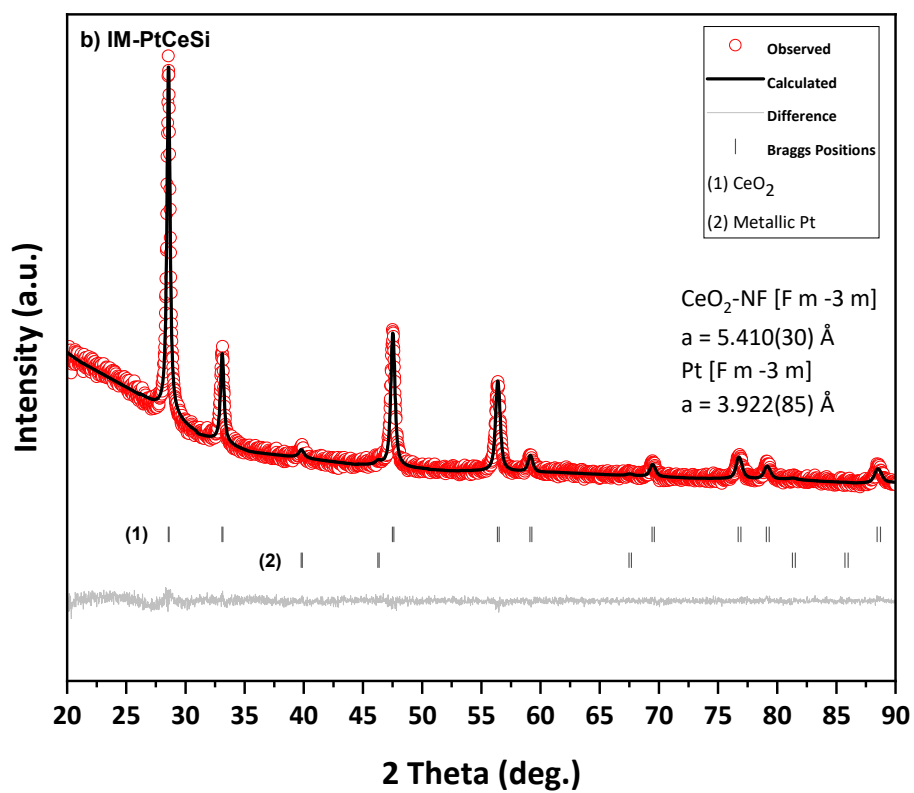

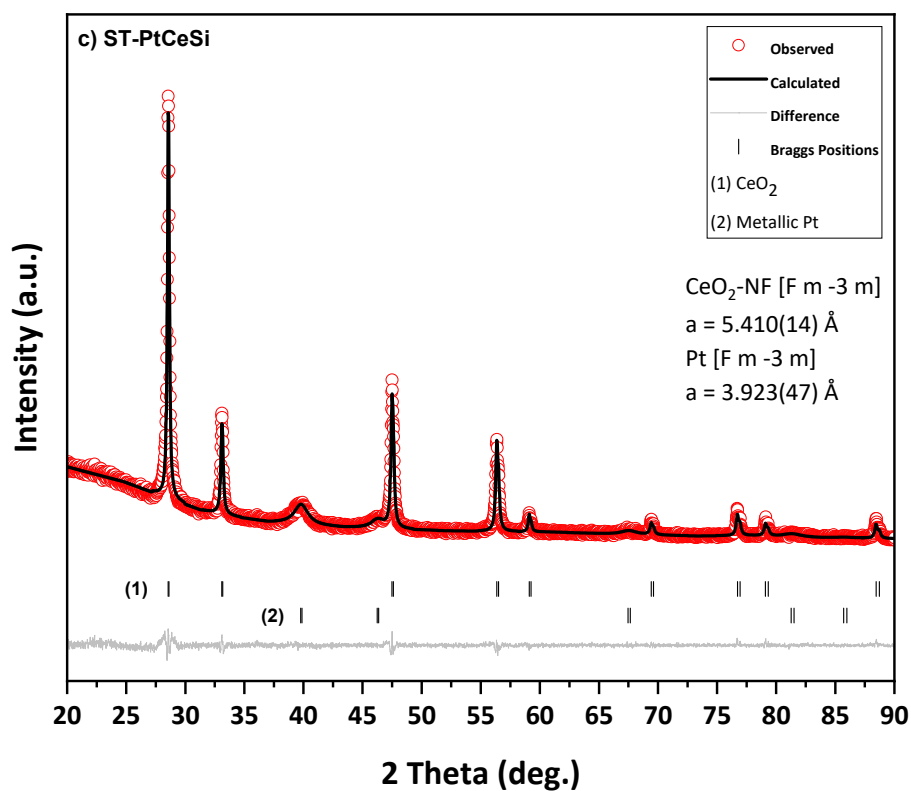

**Figure S1.** XRD Rietveld Refinement of (a) CeO<sub>2</sub>-NF with the lattice parameter of 5.411(15) Å, (b) IM-PtCeSi with the lattice parameter of 5.410(30) Å and 3.922(85) Å for CeO<sub>2</sub> and Pt, respectively, and Pt weight fraction of 2.5(0.2) wt% and (c) ST-PtCeSi with the lattice parameter of 5.410(14) Å and 3.923(47) Å for CeO<sub>2</sub> and Pt, respectively, and Pt weight fraction of 19.2(0.5) wt%. The lattice parameter of CeO<sub>2</sub> was kept intact after introducing Pt meaning the reduction of CeO<sub>2</sub> was occurred only on the surface not in the bulk.

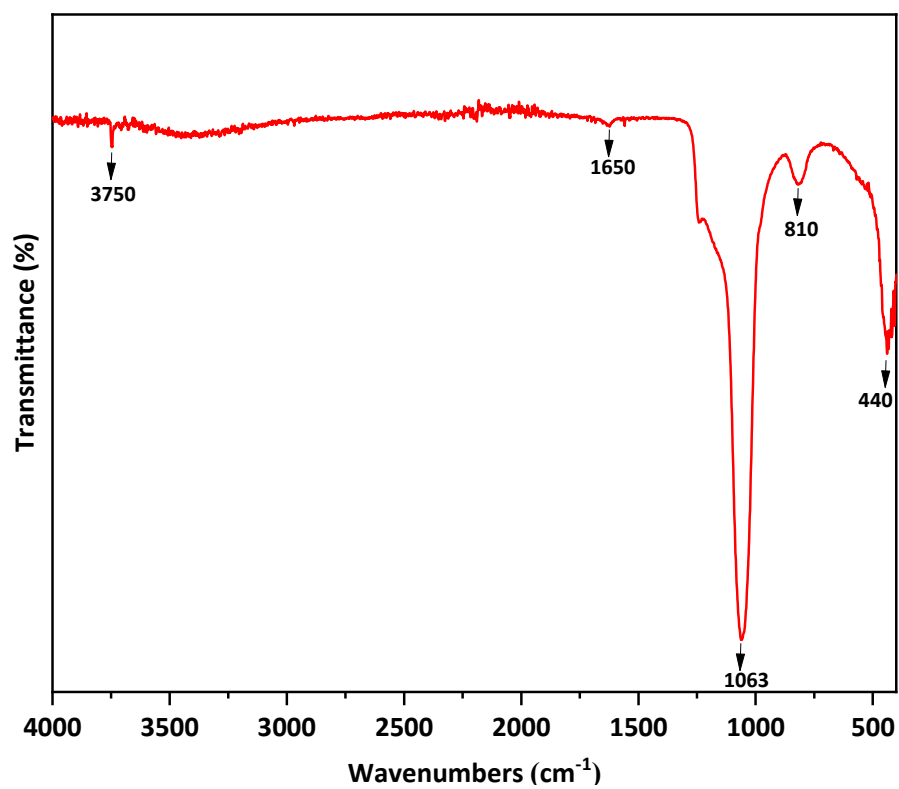

Figure S2. FTIR spectra of CeSi.

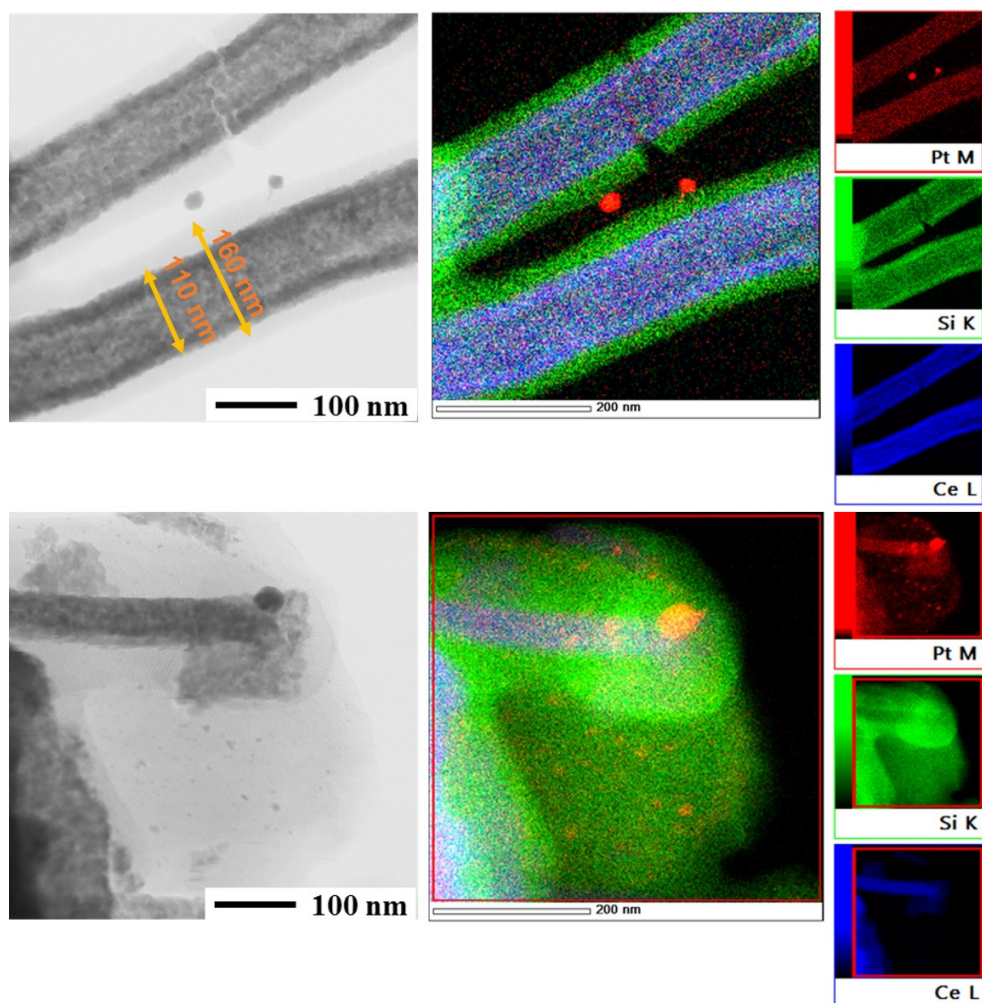

**Figure S3.** STEM and EDS elemental mapping of IM-PtCeSi with 10% loading of CeO<sub>2</sub> with Pt in bright field mode and EDS elemental mapping of elements, red color is Pt, green is Si and Blue is Ce.

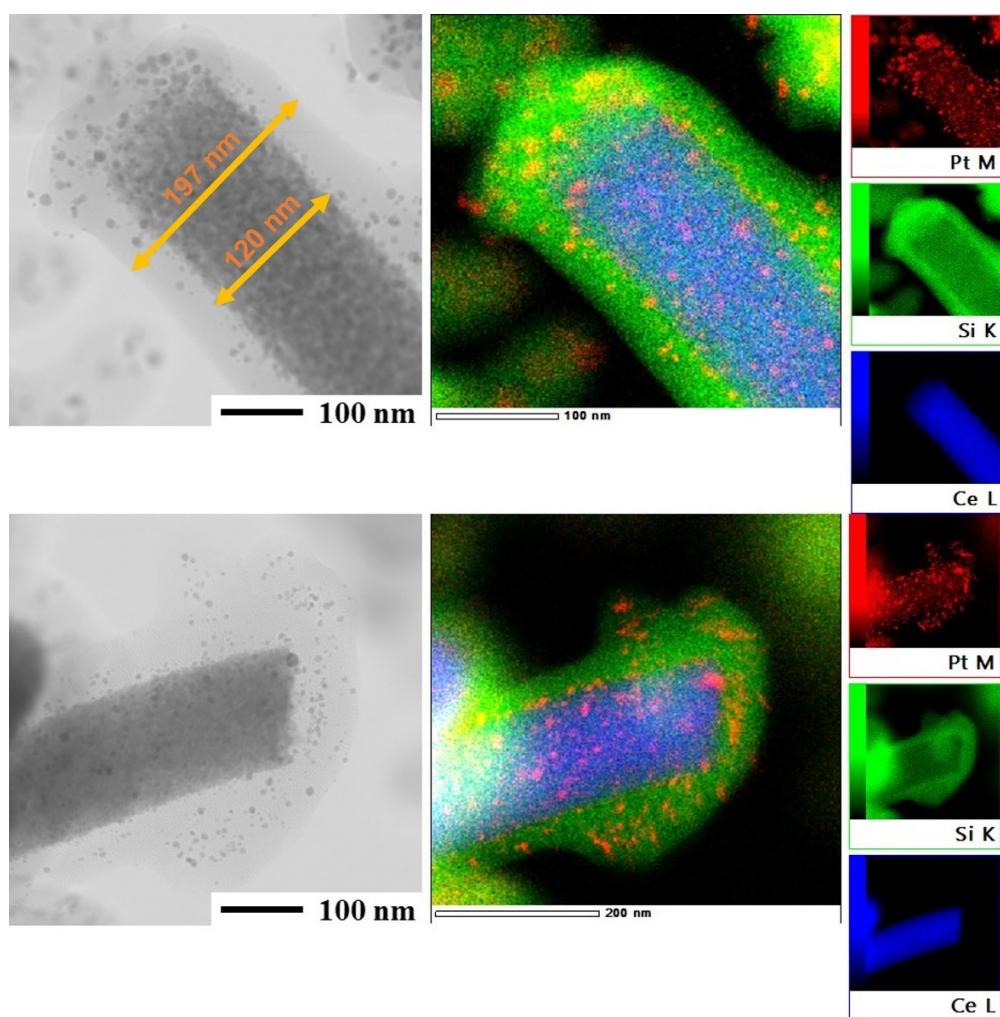

**Figure S4.** STEM and EDS elemental mapping of ST-PtCeSi with 10% loading of CeO<sub>2</sub> with Pt.

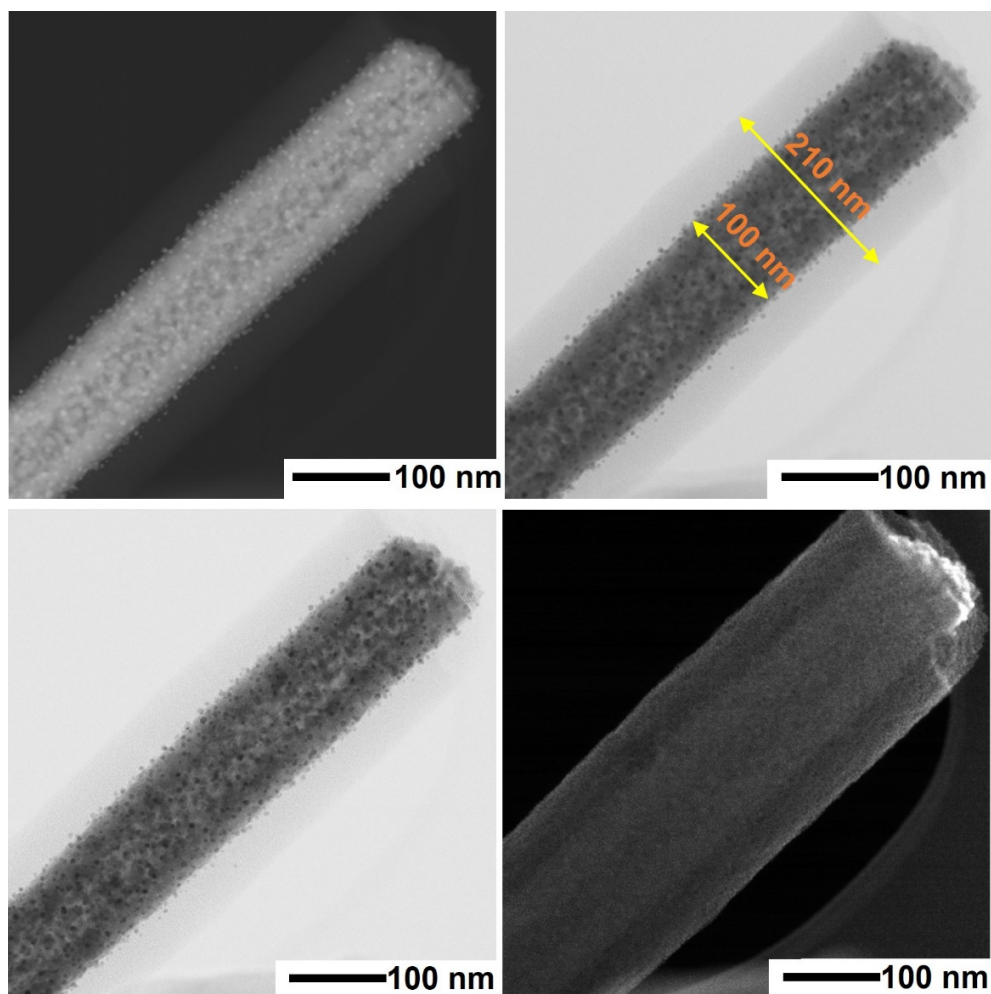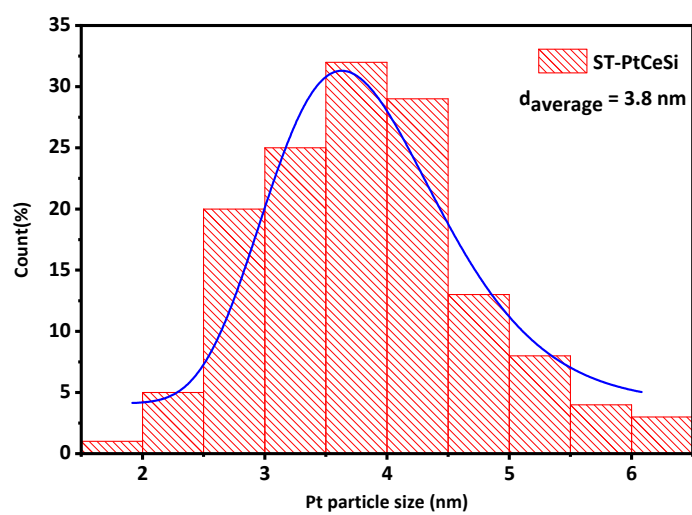

**Figure S5.** STEM of ST-PtCeSi after optimization of Pt with the Pt particle size distribution in ST-PtCeSi histogram plot (the average particle size is 3.8 nm).

The fractions of  $\text{Ce}^{4+}$  and  $\text{Ce}^{3+}$  were calculated using Equations (S1)-(S3) [66]:

$$V_{\text{Ce}^{4+}} = V(v) + V(u) + V(v'') + V(u'') + V(v''') + V(u''') \quad (\text{S1})$$

$$V_{\text{Ce}^{3+}} = V(u_0) + V(v_0) + V(v') + V(u') \quad (\text{S2})$$

$$\% \text{Ce}^{3+} = \frac{V_{\text{Ce}^{3+}}}{V_{\text{Ce}^{3+}} + V_{\text{Ce}^{4+}}} \times 100 \% \quad (\text{S3})$$

Where  $V$  is the integrated peak area of the corresponding peaks.

XPS spectra related to O 1s are illustrated in Figure S6. Three characteristic peaks can be observed. The first feature appears at the peaks of 528.7-529.7 eV, which is attributed to oxygen bounded to Ce species of  $\text{Ce}^{3+}$  and  $\text{Ce}^{4+}$  lattice oxygen ( $\text{O}^{2-}$ ,  $\text{O}_\alpha$ ). The other oxygen state occurs in the peak range of 531.1-531.8 eV that is assigned to the defect oxygen sites, oxygen vacancy ( $\text{O}^-$ ,  $\text{O}_\beta$ ) [59,60]. The third peak at 532.1-532.8 eV is accredited to the oxygen anions ( $\text{O}_2^-$ ) seated near oxygen vacancy [61-63] which might be OH groups and adsorbed water [64]. The lattice oxygen peak appeared for all samples without  $\text{SiO}_2$  sheath layer.

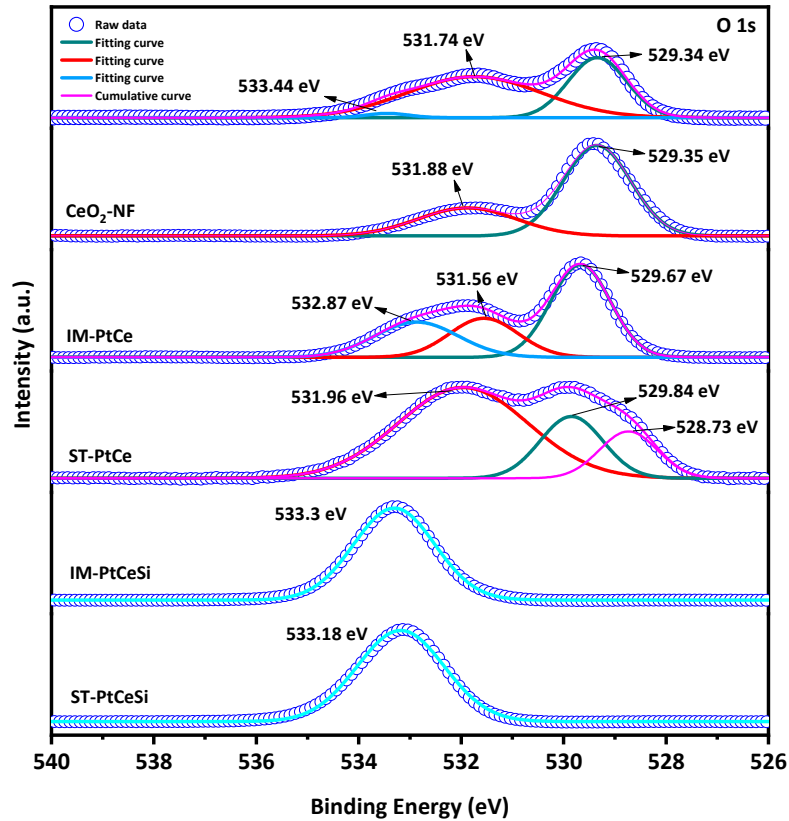

Figure S6. XPS for O 1s for all samples.



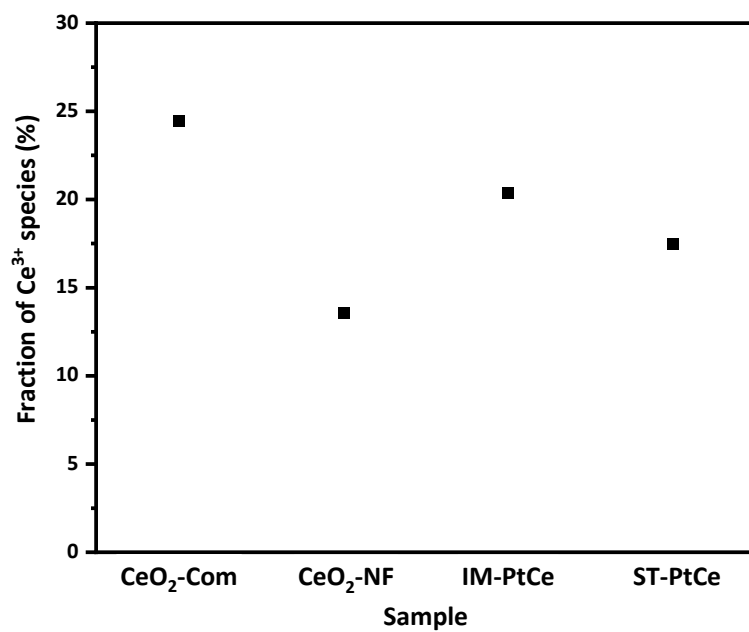

**Figure S7.** Ce<sup>3+</sup> species are present in the samples of CeO<sub>2</sub>-Com, CeO<sub>2</sub>-NF, IM-PtCe, and ST-PtCe which all are without the SiO<sub>2</sub> sheath.

**Table S1.** Peak positions, Ce oxidation state, and integrated area of all samples showed in Figure 7, compared to the reference peak positions and corresponded oxidation states from [70].

| Ce oxidation state | Spin-orbit splitting | Peak assignment | Samples   |                       |           |                      |           |         |           |         |           |           |           |           |           |
|--------------------|----------------------|-----------------|-----------|-----------------------|-----------|----------------------|-----------|---------|-----------|---------|-----------|-----------|-----------|-----------|-----------|
|                    |                      |                 | Reference | CeO <sub>2</sub> -Com |           | CeO <sub>2</sub> -NF |           | IM-PtCe |           | ST-PtCe |           | IM-PtCeSi |           | ST-PtCeSi |           |
|                    |                      |                 | BE (eV)   | BE (eV)               | Peak area | BE (eV)              | Peak area | BE (eV) | Peak area | BE (eV) | Peak area | BE (eV)   | Peak area | BE (eV)   | Peak area |
| Ce <sup>4+</sup>   | Ce 3d <sub>3/2</sub> | u'''            | 916.7     | 916,8                 | 45122.4   | 916,64               | 70186.5   | 916,9   | 77433.0   | 916,58  | 24232.7   | 916.9     | 7946.5    | 917.4     | 21922.7   |
|                    | Ce 3d <sub>3/2</sub> | u''             | 907.45    | 907,5                 | 37331.7   | 907,38               | 56452.0   | 907,71  | 70075.7   | 907,1   | 29523.0   | -         | -         | -         | -         |
|                    | Ce 3d <sub>3/2</sub> | u               | 901.06    | 900,7                 | 27654.2   | 900,85               | 55549.7   | 901,2   | 64024.0   | 900,87  | 25965.3   | -         | -         | -         | -         |
|                    | Ce 3d <sub>3/2</sub> | v'''            | 898.4     | 898,1                 | 65783.2   | 898,24               | 116168.0  | 898,5   | 114887.1  | 898,18  | 38272.7   | -         | -         | -         | -         |
|                    | Ce 3d <sub>3/2</sub> | v''             | 888.85    | 888,87                | 79816.0   | 888,98               | 121170.0  | 889,31  | 122069.8  | 888,7   | 42533.0   | -         | -         | -         | -         |
|                    | Ce 3d <sub>3/2</sub> | v               | 882.6     | 882,3                 | 88332.5   | 882,45               | 150918.0  | 882,8   | 129545.3  | 882,47  | 51702.1   | -         | -         | -         | -         |
| Ce <sup>3+</sup>   | Ce 3d <sub>3/2</sub> | u'              | 904.05    | 903,1                 | 54816.8   | 902,95               | 56911.8   | 903,2   | 73984.0   | 903,17  | 13148.0   | 904.6     | 36792.0   | 905.2     | 97679.8   |
|                    | Ce 3d <sub>3/2</sub> | u <sub>0</sub>  | 898.9     | -                     | -         | -                    | -         | -       | -         | -       | -         | 900.3     | 17670     | 900.7     | 49955.7   |
|                    | Ce 3d <sub>3/2</sub> | v'              | 885.45    | 884,7                 | 29704.3   | 884,55               | 43956.3   | 884,8   | 58227.5   | 884,77  | 14328.4   | 886.2     | 50286.6   | 886.7     | 134797.8  |
|                    | Ce 3d <sub>3/2</sub> | v <sub>0</sub>  | 880.6     | -                     | -         | -                    | -         | -       | -         | -       | -         | 882.0     | 28526.8   | 882.5     | 73278.7   |

**Table S2.** Pt peaks with corresponded oxidation states occurred in Figure 8.

| Pt oxidation state | Spin-orbit splitting | Samples |           |         |           |
|--------------------|----------------------|---------|-----------|---------|-----------|
|                    |                      | IM-PtCe | IM-PtCeSi | ST-PtCe | ST-PtCeSi |
|                    |                      | BE (eV) | BE (eV)   | BE (eV) | BE (eV)   |
| Pt <sup>2+</sup>   | Pt 4f <sub>7/2</sub> | 72.8    | 72.6      | 73.38   | -         |
|                    | Pt 4f <sub>5/2</sub> | 76.15   | 75.95     | 76.73   | -         |
| Pt <sup>0</sup>    | Pt 4f <sub>7/2</sub> | -       | -         | 70.96   | 71.25     |
|                    | Pt 4f <sub>5/2</sub> | -       | -         | 74.31   | 74.6      |

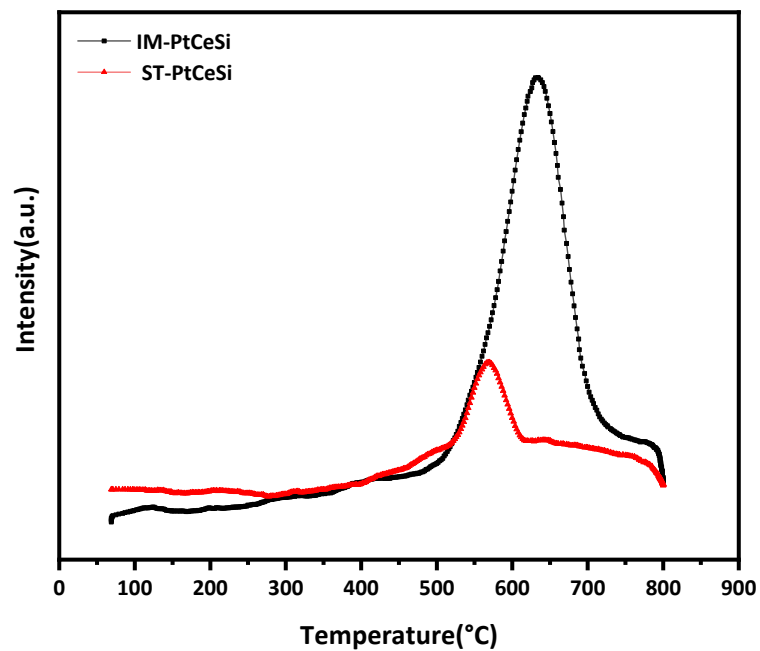

Figure S8. CO<sub>2</sub>-TPD profile of IM-PtCeSi and ST-PtCeSi core-sheath NF catalysts.

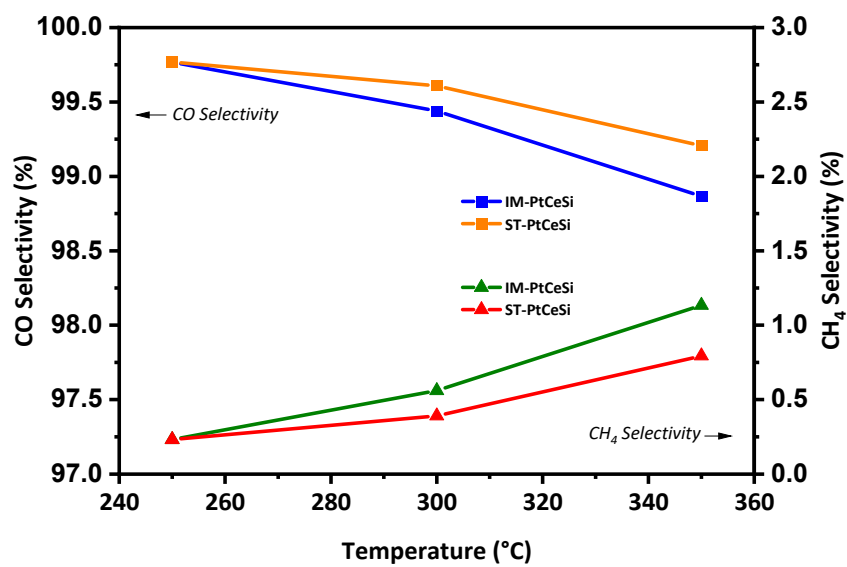

Figure S9. CO selectivity and CH<sub>4</sub> selectivity at different reaction temperatures for two tested catalysts.

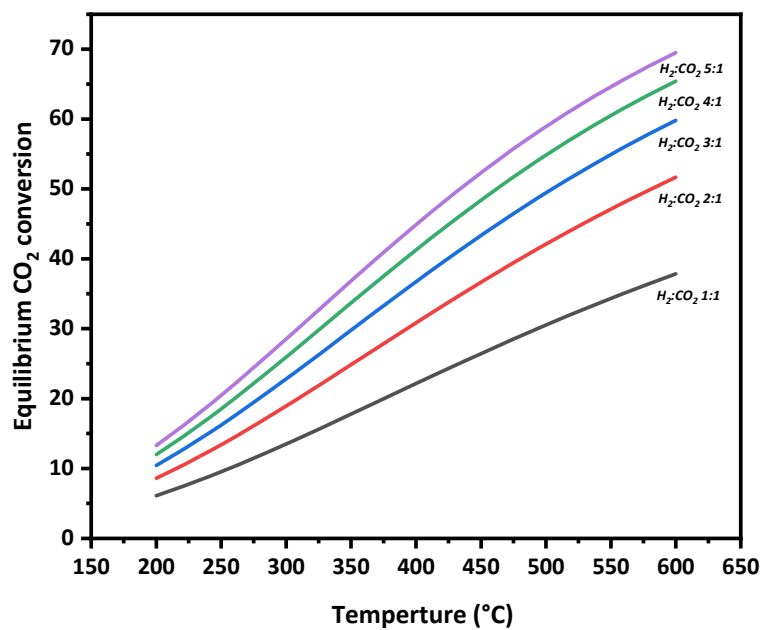

**Figure S10.** Equilibrium conversion of CO<sub>2</sub> at different temperature with different H<sub>2</sub>:CO<sub>2</sub> compositions.

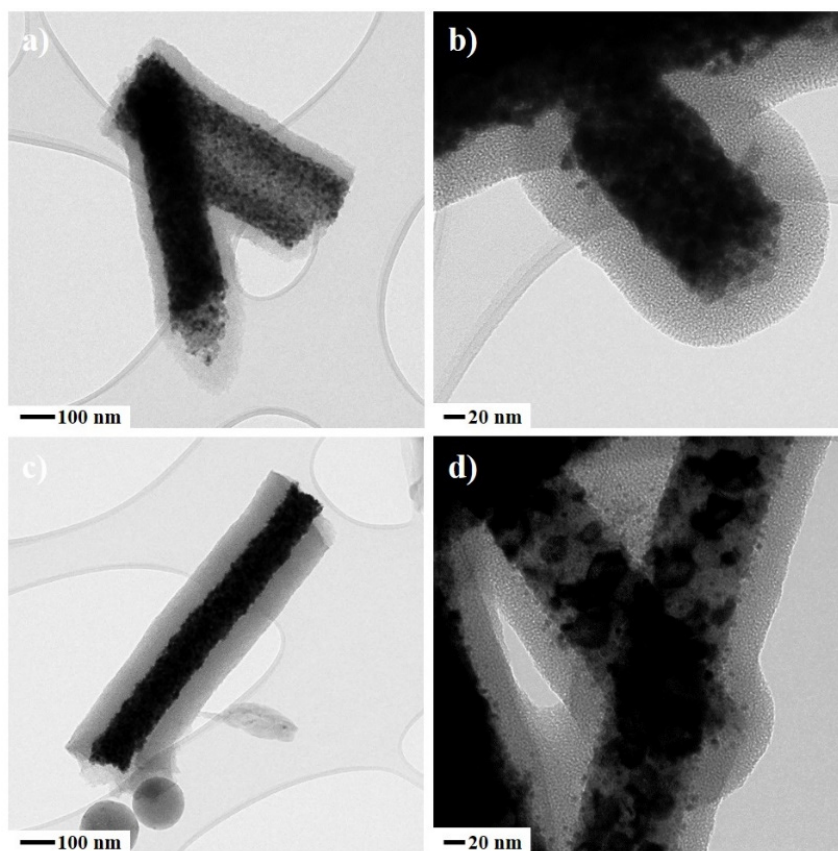

**Figure S11.** TEM images of tested catalysts (a) and (b) IM-PtCeSi, (c) and (d) ST-PtCeSi.
